# Supplementary material for: Structural regulation of Co-based coordination polymers by adjusting solvent polarity toward electrocatalytic hydrogen evolution performance
Source: Royal Society of Chemistry journal article supplement (doi:10.1039/d2nj00945e), 2022-01-01
Supplement: d2nj00945e1.pdf [file d2nj00945e1.pdf]

# Structural Regulation of Co-based Coordination Polymers By Adjusting Solvent Polarity toward Electrocatalytic Hydrogen Evolution Performances

Ling Qin<sup>a,\*</sup>, Qi-Ming Zheng<sup>a</sup>, Jin-Liang Liu<sup>a</sup>, Xiao-Yan Zhou<sup>a</sup>, Yan-Qing Wang<sup>a</sup>,  
Ming-Dao Zhang<sup>b</sup>

<sup>a</sup>*School of Chemistry and Chemical Engineering, Hefei University of Technology, Hefei, 230009, Anhui, P. R. China.*

<sup>b</sup>*School of Environmental Science and Engineering, Nanjing University of Information Science & Technology, Jiangsu Key Laboratory of Atmospheric Environment Monitoring and Pollution Control, Collaborative Innovation Center of Atmospheric Environment and Equipment Technology, Nanjing 210044, P. R. China.*

**Table S1** Selected bond lengths (Å) and angles (deg) for compounds **1D-3D**.

| <b>1D</b>   |            | <b>2D</b>    |            | <b>3D</b>     |            |
|-------------|------------|--------------|------------|---------------|------------|
| Co1-O1      | 2.1083(19) | Co1-O1       | 2.057(3)   | Co1-O1        | 1.989(2)   |
| Co1-O1W     | 2.094(2)   | Co1-O1W      | 2.252(3)   | Co1-N1        | 2.090(3)   |
| Co1-O2W     | 2.1894(19) | Co1-N1       | 2.049(3)   | Co1-N3_a      | 2.138(2)   |
| Co1-O3W     | 2.076(2)   | Co1-N3       | 2.104(3)   | Co1-O4_b      | 2.004(2)   |
| Co1-N1      | 2.115(2)   | Co1-O4_a     | 2.002(3)   | Co1-O3_c      | 2.064(2)   |
| Co1-N4_a    | 2.119(2)   | O1-Co1-O1W   | 81.97(12)  | O1-Co1-N1     | 95.34(11)  |
| O1-Co1-O1W  | 87.47(8)   | O1-Co1-N1    | 138.37(13) | O1-Co1-N3_a   | 89.37(9)   |
| O1-Co1-O2W  | 88.53(7)   | O1-Co1-N3    | 95.77(12)  | O1-Co1-O4_b   | 122.46(10) |
| O1-Co1-O3W  | 92.64(8)   | O1-Co1-C13   | 28.59(14)  | O1-Co1-O3_b   | 103.72(9)  |
| O1-Co1-N1   | 175.01(8)  | O1W-Co1-N1   | 85.68(11)  | N1-Co1-N3_a   | 175.05(10) |
| O1-Co1-N4a  | 86.82(8)   | O1W-Co1-N3   | 172.48(12) | O4_b-Co1-N1   | 90.78(10)  |
| O1W-Co1-O2W | 83.11(8)   | O1W-Co1-O4_a | 83.62(12)  | O3_c-Co1-N1   | 93.51(10)  |
| O1W-Co1-O3W | 173.55(8)  | N1-Co1-N3    | 100.61(12) | O4_b-Co1-N3_a | 85.39(9)   |
| O1W-Co1-N1  | 88.14(8)   | O4_a-Co1-N1  | 98.37(13)  | O3_c-Co1-N3_a | 86.85(9)   |

|              |           |             |           |               |           |
|--------------|-----------|-------------|-----------|---------------|-----------|
| O1W-Co1-N4_a | 93.65(8)  | O4_a-Co1-N3 | 91.32(12) | O3_c-Co1-O4_b | 132.97(9) |
| O2W-Co1-O3W  | 90.45(8)  |             |           |               |           |
| O2W-Co1-N1   | 88.58(8)  |             |           |               |           |
| O2W-Co1-N4_a | 174.45(8) |             |           |               |           |
| O3W-Co1-N1   | 91.45(9)  |             |           |               |           |
| O3W-Co1-N4_a | 92.79(9)  |             |           |               |           |
| N1-Co1-N4_a  | 95.84(9)  |             |           |               |           |

Symmetry codes for compound **1D**:  $a = -1 + x, y, z$ ; Symmetry codes for compound **2D**:  $a = -1 + x, y, z$ ; Symmetry codes for compound **3D**:  $a = 1 + x, y, 1 + z$ ;  $b = 1/2 - x, -1/2 + y, 3/2 - z$ ;  $c = 1/2 + x, 1/2 - y, -1/2 + z$ .

**Table S2** XPS spectra analysis for N 1s signal of **2D**-T sample.

| Sample         | Pyridinic-N     | Co-Nx           | Graphitic-N     |
|----------------|-----------------|-----------------|-----------------|
| <b>2D</b> -400 | 398.5 eV, 58%   | 399.4 eV, 12.2% | 400.7 eV, 29.8% |
| <b>2D</b> -500 | 398.6 eV, 48.1% | 399.4 eV, 19.3% | 400.7 eV, 32.6% |
| <b>2D</b> -600 | 398.7 eV, 50.5% | 399.5 eV, 16.7% | 400.7 eV, 32.8% |

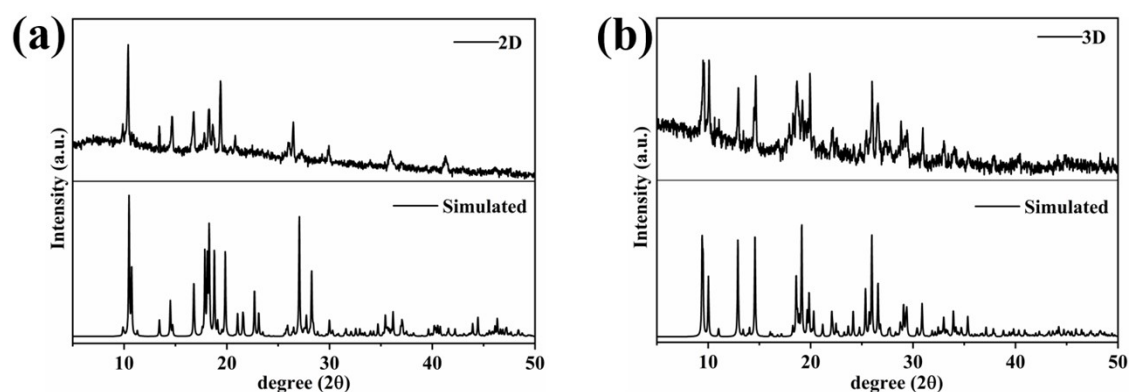

**Figure S1** Experimental and simulated PXRD patterns of compounds **2D** and **3D**.

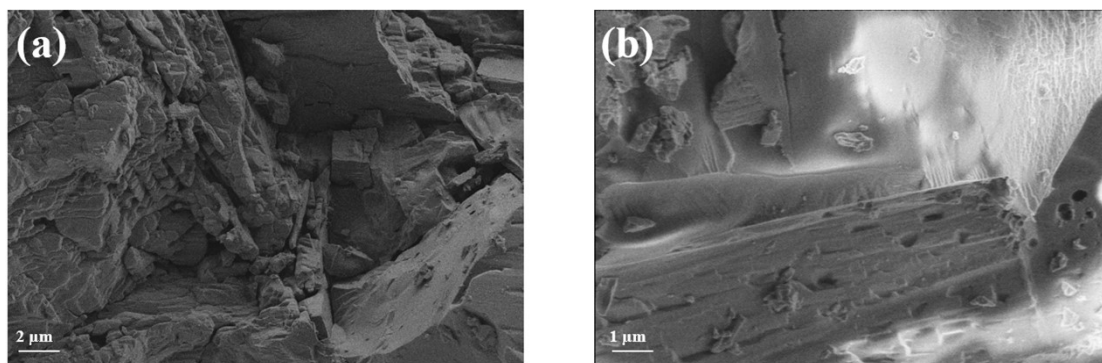

Figure S2 SEM images of (a) compound 2D, (b) compound 3D.

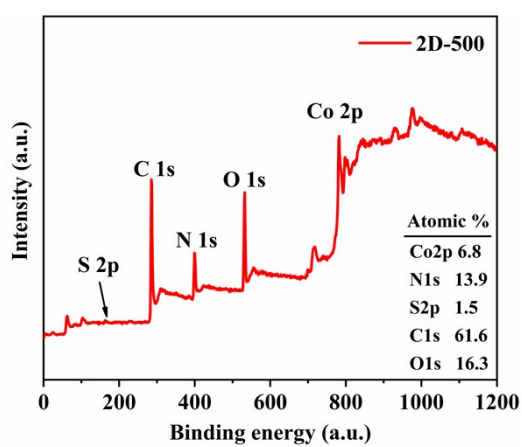

Figure S3 XPS survey spectra of 2D-500.

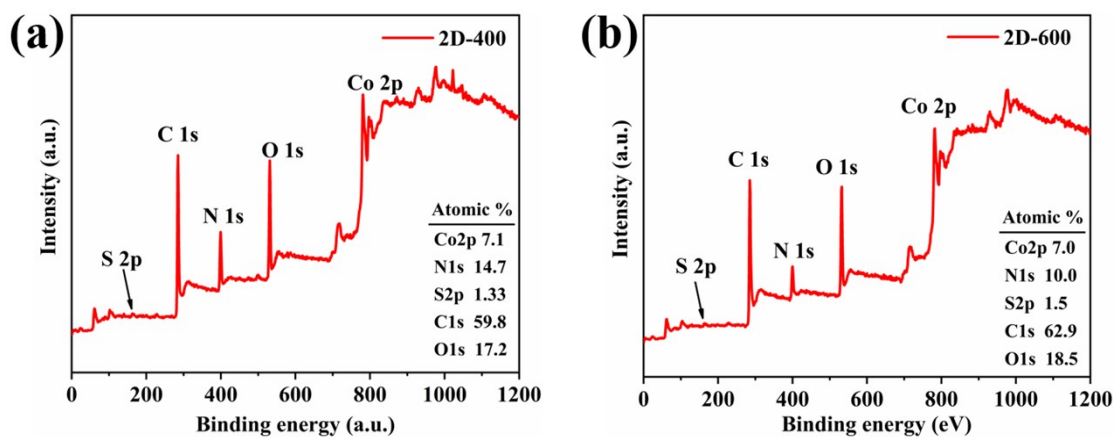

Figure S4 XPS survey spectra of (a) 2D-400, (b) 2D-600.
